# The algorithm for proven and young (APY) from a different perspective

Mohammad Ali Nilforooshan 

Livestock Improvement Corporation, Private Bag 3016, Hamilton 3240, New Zealand  
[mohammad.nilforooshan@lic.co.nz](mailto:mohammad.nilforooshan@lic.co.nz)

## Abstract

The inverse of the genomic relationship matrix ( $\mathbf{G}^{-1}$ ) is used in the single-step genomic BLUP, which incorporates genomic, pedigree, and phenotype information for simultaneous genetic evaluation of genotyped and non-genotyped individuals. The rapidly growing number of genotypes is a constraint for inverting a huge  $\mathbf{G}$ . The APY algorithm is an efficient method of solving this issue. Matrix  $\mathbf{G}$  has a limited dimensionality. Dividing individuals into core and non-core,  $\mathbf{G}^{-1}$  is approximated via the inverse partition of  $\mathbf{G}$  for core individuals. The quality of the approximation depends on the core size and composition. The APY algorithm conditions genomic breeding values of the non-core individuals to those of the core individuals, leading to a diagonal block of  $\mathbf{G}^{-1}$  for non-core individuals ( $\mathbf{M}_{nn}^{-1}$ ). Dividing observations into two groups (*e.g.*, core and non-core, or genotyped and non-genotyped), any symmetric matrix can be expressed in APY and APY inverse expressions, equal to the matrix itself and its inverse, respectively. The change of  $\mathbf{G}^{nn}$  to  $\mathbf{M}_{nn}^{-1}$  makes APY an approximate. The application of APY is extendable to the inversion of any large symmetric matrix with a limited dimensionality at a lower computational cost. Possible applications are: computing the pedigree relationship matrix ( $\mathbf{A}$ ) from the APY inverse of  $\mathbf{A}^{-1}$ , a diagonal block of  $\mathbf{A}$  (same as the previous one, but avoiding unnecessary calculations), and the block of the block-diagonal preconditioner matrix corresponding to marker effects for iterative solving of marker effect model equations. Furthermore, APY may improve the matrix's numerical condition.

**Keywords:** APY, diagonal, dimensionality, GBLUP, single-step, relationship matrix

## 1 Introduction

Genomic evaluations are mainly performed using the genomic relationship matrix  $\mathbf{G}$  in the so-called method genomic BLUP (GBLUP, VanRaden, 2008) or random regression SNP marker models called SNP-BLUP (Koivula et al., 2012). The first predicts genomic breeding values of genotyped individuals, and the latter predicts marker effects (*i.e.*, allele substitution effects). Simultaneous genetic evaluation of genotyped and non-genotyped individuals for obtaining optimal and unbiased evaluations not limited to genotyped individuals, both methods were elevated to single-step GBLUP (ssGBLUP, Aguilar et al., 2010; Christensen and Lund, 2010), and single-step SNP-BLUP (ss-SNP-BLUP, Fernando et al., 2014), also called the single-step marker effect model.

The number of genotyped individuals is rapidly growing, and the most expensive operation in GBLUP and ssGBLUP is inverting matrix  $\mathbf{G}$ . As the number of genotyped individuals reaches the number of markers, the numerical condition of  $\mathbf{G}$  deteriorates. By the number of genotypes exceeding the number of markers,  $\mathbf{G}$  becomes singular and non-invertible. Furthermore, the cost of inverting  $\mathbf{G}$  and  $\mathbf{A}_{22}$  (the block of  $\mathbf{A}$  corresponding to genotyped individuals, where  $\mathbf{A}$  is the pedigree-based additive genetic relationship matrix) required for ssGBLUP is cubic, and there is a bottleneck of direct inversion of a matrix of size about 150,000 (Fragomeni et al., 2015). Three solutions were proposed for this problem (Misztal et al., 2014; Fernando et al., 2016; Mäntysaari et al., 2017), one being the algorithm for proven and young (APY, Misztal et al., 2014). This algorithm belongs to a group of methods called approximate kernel methods or Gaussian process approximations (Snelson and Ghahramani, 2007). APY forms a sparse representation of  $\mathbf{G}^{-1}$  ( $\mathbf{G}_{\text{APY}}^{-1}$ ), dividing genotyped individuals to core ( $c$ ) and non-core ( $n$ ) subsets. Direct inversion is only required for the block of  $\mathbf{G}$  corresponding to core individuals ( $\mathbf{G}_{cc}$ ). Consequently, the  $O((c+n)^3)$  computational cost is reduced to  $O(c^3) + O(n)$ . In the APY algorithm, genomic breeding values of non-core individuals are conditioned on the genomic breeding values of core individuals. This algorithm is based on the assumption that the dimensionality of  $\mathbf{G}$  is limited and that independent chromosome segments explain the rank of  $\mathbf{G}$  (Misztal, 2016). As long as the number of core individuals is greater than

45 the number of independent chromosome segments (Misztal et al., 2014), and the core subset covers the  
 46  $\mathbf{G}$  spectrum (Bermann et al., 2022) it may not take all the genotyped individuals to explain the variation  
 47 in  $\mathbf{G}$ . Therefore, the variation in  $\mathbf{G}$  can be explained by the core subset, and genomic breeding values of  
 48 the non-core individuals are expressed as a linear function of those from the core individuals (Bermann  
 49 et al., 2022). As such, the accuracy of the APY algorithm depends on the core size and composition.

50 The  $\mathbf{G}_{\text{APY}}^{-1}$  matrix is calculated as (Bermann et al., 2022):

$$\begin{aligned}\mathbf{G}_{\text{APY}}^{-1} &= \begin{bmatrix} \mathbf{I} & -\mathbf{P}_{cn} \\ \mathbf{0} & \mathbf{I} \end{bmatrix} \begin{bmatrix} \mathbf{G}_{cc}^{-1} & \mathbf{0} \\ \mathbf{0} & \mathbf{M}_{nn}^{-1} \end{bmatrix} \begin{bmatrix} \mathbf{I} & -\mathbf{P}_{cn} \\ \mathbf{0} & \mathbf{I} \end{bmatrix}' \\ &= \begin{bmatrix} \mathbf{G}_{cc}^{-1} & \mathbf{0} \\ \mathbf{0} & \mathbf{0} \end{bmatrix} + \begin{bmatrix} \mathbf{P}_{cn}\mathbf{M}_{nn}^{-1}\mathbf{P}_{nc} & -\mathbf{P}_{cn}\mathbf{M}_{nn}^{-1} \\ -\mathbf{M}_{nn}^{-1}\mathbf{P}_{nc} & \mathbf{M}_{nn}^{-1} \end{bmatrix} \\ &= \begin{bmatrix} \mathbf{G}_{cc}^{-1} & \mathbf{0} \\ \mathbf{0} & \mathbf{0} \end{bmatrix} + \begin{bmatrix} -\mathbf{P}_{cn} \\ \mathbf{I} \end{bmatrix} \mathbf{M}_{nn}^{-1} \begin{bmatrix} -\mathbf{P}_{cn} \\ \mathbf{I} \end{bmatrix}',\end{aligned}\quad (1)$$

51 where,  $\mathbf{M}_{nn} = \mathbf{G}_{nn} - \mathbf{P}_{nc}\mathbf{G}_{cn}$ , and  $\mathbf{P}_{cn} = \mathbf{G}_{cc}^{-1}\mathbf{G}_{cn}$ . In practice,  $\text{diag}(\mathbf{M}_{nn})$  is used instead of  $\mathbf{M}_{nn}$ .  
 52 Strandén et al. (2017) and Bermann et al. (2022) showed that:

$$\begin{aligned}\mathbf{G}_{\text{APY}} &= \begin{bmatrix} \mathbf{I} & \mathbf{0} \\ \mathbf{P}_{nc} & \mathbf{I} \end{bmatrix} \begin{bmatrix} \mathbf{G}_{cc} & \mathbf{0} \\ \mathbf{0} & \mathbf{M}_{nn} \end{bmatrix} \begin{bmatrix} \mathbf{I} & \mathbf{0} \\ \mathbf{P}_{nc} & \mathbf{I} \end{bmatrix}' \\ &= \begin{bmatrix} \mathbf{G}_{cc} & \mathbf{G}_{cn} \\ \mathbf{G}_{nc} & \mathbf{M}_{nn} + \mathbf{P}_{nc}\mathbf{G}_{cn} \end{bmatrix} \\ &= \mathbf{G} + \begin{bmatrix} \mathbf{0} & \mathbf{0} \\ \mathbf{0} & \mathbf{M}_{nn} + \mathbf{P}_{nc}\mathbf{G}_{cn} - \mathbf{G}_{nn} \end{bmatrix}.\end{aligned}\quad (2)$$

53 The aim of this study is to provide new insights and possible applications for the APY algorithm.

## 54 2 Theory and discussion

### 55 2.1 The APY and APY inverse expressions

56 In this subsection, it is shown that any covariance or inverse covariance (generally any symmetric)  
 57 matrix has expressions, here called APY and APY inverse expressions. A new way of understanding  
 58 the properties of the APY inverse expression of  $\mathbf{G}$  (*i.e.*,  $\mathbf{G}_{\text{APY}}^{-1}$ ) is through understanding the hybrid  
 59 pedigree-genomic relationship matrix ( $\mathbf{H}$ ) used in ssGBLUP. Legarra et al. (2009) derived various forms  
 60 of the same relationship matrix, including full pedigree and genomic information. Denoting genotyped  
 61 and non-genotyped individuals as 2 and 1:  $\mathbf{H} =$

$$\begin{bmatrix} \mathbf{A}_{11} + \mathbf{A}_{12}\mathbf{A}_{22}^{-1}(\mathbf{G} - \mathbf{A}_{22})\mathbf{A}_{22}^{-1}\mathbf{A}_{21} & \mathbf{A}_{12}\mathbf{A}_{22}^{-1}\mathbf{G} \\ \mathbf{G}\mathbf{A}_{22}^{-1}\mathbf{A}_{21} & \mathbf{G} \end{bmatrix}, \quad (3)$$

$$\begin{bmatrix} (\mathbf{A}^{11})^{-1} + (\mathbf{A}^{11})^{-1}\mathbf{A}^{12}\mathbf{G}\mathbf{A}^{21}(\mathbf{A}^{11})^{-1} & -(\mathbf{A}^{11})^{-1}\mathbf{A}^{12}\mathbf{G} \\ -\mathbf{G}\mathbf{A}^{21}(\mathbf{A}^{11})^{-1} & \mathbf{G} \end{bmatrix}, \quad (4)$$

$$\mathbf{A} + \begin{bmatrix} \mathbf{A}_{12}\mathbf{A}_{22}^{-1}(\mathbf{G} - \mathbf{A}_{22})\mathbf{A}_{22}^{-1}\mathbf{A}_{21} & \mathbf{A}_{12}\mathbf{A}_{22}^{-1}(\mathbf{G} - \mathbf{A}_{22}) \\ (\mathbf{G} - \mathbf{A}_{22})\mathbf{A}_{22}^{-1}\mathbf{A}_{21} & \mathbf{G} - \mathbf{A}_{22} \end{bmatrix}. \quad (5)$$

62 It worth mentioning that replacing  $\mathbf{G}$  with  $\mathbf{A}_{22}$  in any of these equations turns  $\mathbf{H}$  to  $\mathbf{A}$ . Similarly,  
 63 replacing  $\mathbf{G}$  with  $\mathbf{G}_{nn}$  and  $\mathbf{A}$  with  $\mathbf{G}$  turns  $\mathbf{H}$  to  $\mathbf{G}$ . The above equations can be simplified to:

$$\mathbf{H} = \begin{bmatrix} (\mathbf{A}^{11})^{-1} & \mathbf{0} \\ \mathbf{0} & \mathbf{0} \end{bmatrix} + \begin{bmatrix} -\mathbf{P}_{12} \\ \mathbf{0} \end{bmatrix} \mathbf{G} \begin{bmatrix} -\mathbf{P}_{12} \\ \mathbf{0} \end{bmatrix}', \quad (6)$$

$$\mathbf{H} = \mathbf{A} + \begin{bmatrix} -\mathbf{P}_{12} \\ \mathbf{0} \end{bmatrix} (\mathbf{G} - \mathbf{A}_{22}) \begin{bmatrix} -\mathbf{P}_{12} \\ \mathbf{0} \end{bmatrix}', \quad (7)$$

64 where, the projection matrix  $\mathbf{P}_{12} = (\mathbf{A}^{11})^{-1}\mathbf{A}^{12} = -\mathbf{A}_{12}\mathbf{A}_{22}^{-1}$ . A nice property of  $\mathbf{H}$  is that its  
 65 inverse can be derived directly with no need to form and invert  $\mathbf{H}$  (Aguilar et al., 2010; Christensen and  
 66 Lund, 2010):

$$\mathbf{H}^{-1} = \mathbf{A}^{-1} + \begin{bmatrix} \mathbf{0} & \mathbf{0} \\ \mathbf{0} & \mathbf{G} - \mathbf{A}_{22}^{-1} \end{bmatrix}. \quad (8)$$

Matrix  $\mathbf{H}^{-1}$  replaces  $\mathbf{A}^{-1}$  in BLUP for ssGBLUP. Replacing  $\mathbf{G}$  with  $\mathbf{M}_{nn}^{-1}$ ,  $\mathbf{A}^{-1}$  with  $\mathbf{G}$ , and notations 1 and 2 with  $c$  and  $n$ , respectively, turns Eq. 6 to Eq. 1. This shows that Eq. 6 is the APY inverse expression of  $\mathbf{H}^{-1}$ . Following Eq. 2, the APY expression of  $\mathbf{H}^{-1}$  is:

$$\mathbf{H}_{\text{APY}}^{-1} = \mathbf{H}^{-1} + \begin{bmatrix} \mathbf{0} & \mathbf{0} \\ \mathbf{0} & \mathbf{M}^{22} + \mathbf{P}^{21}\mathbf{A}^{21} - \mathbf{H}^{22} \end{bmatrix}, \quad (9)$$

where  $\mathbf{M}^{22} = \mathbf{H}^{22} - \mathbf{P}^{21}\mathbf{A}^{12}$ ,  $\mathbf{P}^{12} = (\mathbf{A}^{11})^{-1}\mathbf{A}^{12}$ , and  $\mathbf{H}^{22} = \mathbf{A}^{22} + \mathbf{G} - \mathbf{A}_{22}^{-1}$ . Similarly, there are APY and APY inverse expressions for  $\mathbf{H}$ .

## 2.2 Understanding the differences between $\mathbf{G}^{-1}$ and $\mathbf{G}_{\text{APY}}^{-1}$

Considering Eq. 1 and 2, as long as no change is made to  $\mathbf{M}_{nn}$ , the APY and the APY inverse expressions of  $\mathbf{G}$  are equal to  $\mathbf{G}$  and  $\mathbf{G}^{-1}$ , respectively. Matrix  $\mathbf{G}_{\text{APY}}^{-1}$  becomes an approximate  $\mathbf{G}^{-1}$  when  $\mathbf{M}_{nn}$  is changed to a diagonal matrix with diagonal elements:

$$m_{ii} = g_{ii} - \mathbf{g}_{ic}\mathbf{G}_{cc}^{-1}\mathbf{g}_{ci}, \quad (10)$$

representing genomic Mendelian sampling (Misztal et al., 2014). Using Eq. 10, calculations can be paralleled across all genotyped individuals. Compared with  $\mathbf{G}^{nn}$ :

$$\begin{aligned} \mathbf{G}_{\text{APY}}^{nn} &= (\text{diag}(\mathbf{M}_{nn}))^{-1} \\ &= (\text{diag}(\mathbf{G}_{nn} - \mathbf{G}_{nc}\mathbf{G}_{cc}^{-1}\mathbf{G}_{cn}))^{-1} \\ &= (\text{diag}((\mathbf{G}^{nn})^{-1}))^{-1}. \end{aligned} \quad (11)$$

The change of  $\mathbf{M}_{nn}$  to  $\text{diag}(\mathbf{M}_{nn})$  is propagated to the other blocks of  $\mathbf{G}_{\text{APY}}^{-1}$  via the projection matrix  $\mathbf{P}_{cn}$  (Eq. 1). No change is made to  $\mathbf{G}_{\text{APY}}$  other than to the off-diagonal elements of  $\mathbf{G}_{nn}$  (Strandén et al., 2017). Following Eq. 2,  $\mathbf{M}_{nn} + \mathbf{P}_{nc}\mathbf{G}_{cn} - \mathbf{G}_{nn} = \mathbf{0}$ . Thus, replacing  $\mathbf{M}_{nn}$  with  $\text{diag}(\mathbf{M}_{nn})$  replaces  $\text{offdiag}(\mathbf{G}_{nn})$  with  $\text{offdiag}(\mathbf{P}_{nc}\mathbf{G}_{cn})$ . Therefore, it can be articulated that genomic relationships among non-core individuals become a function of  $\mathbf{G}_{cc}$  and  $\mathbf{G}_{cn}$ . The efficiency of the APY algorithm depends on how well  $\text{offdiag}(\mathbf{P}_{nc}\mathbf{G}_{cn})$  replaces  $\text{offdiag}(\mathbf{G}_{nn})$ .

## 2.3 Other applications

The application of the APY algorithm is not limited to  $\mathbf{G}^{-1}$ , nor to ssGBLUP and GBLUP. This algorithm can be applied to approximate the inverse of any large symmetric matrix, where the rank of the matrix is smaller than its dimension. Representing any such matrix with  $\mathbf{G}$ , only  $\mathbf{G}_{cc}$  needs to be inverted. Besides reduced matrix inversion cost, there are sparsity-related reduced computational costs.

The first and the only time the APY algorithm was suggested for inverting a matrix other than  $\mathbf{G}$  was by Misztal et al. (2014). They suggested the APY algorithm for the  $\mathbf{A}_{22}$  inversion, which is required in ssGBLUP (Eq. 8). They derived an equivalent formula for the APY approximation of  $\mathbf{A}_{22}^{-1}$ :

$$\mathbf{A}_{22}^{-1} \approx (\mathbf{A}_{22})_{\text{APY}}^{-1} = \begin{bmatrix} \mathbf{A}_{cc}^{-1} & \mathbf{0} \\ \mathbf{0} & \mathbf{0} \end{bmatrix} + \begin{bmatrix} -\mathbf{A}_{cc}^{-1}\mathbf{A}_{cn} \\ \mathbf{I} \end{bmatrix} \mathbf{M}_{nn}^{-1} \begin{bmatrix} -\mathbf{A}_{cc}^{-1}\mathbf{A}_{cn} \\ \mathbf{I} \end{bmatrix}'. \quad (12)$$

Here, the diagonal elements of  $\mathbf{M}_{nn}$  equal  $m_{ii} = a_{ii} - \mathbf{a}_{ic}\mathbf{A}_{cc}^{-1}\mathbf{a}_{ci}$ , where  $i$  is a non-core genotyped individual. The  $\mathbf{a}_{ci}$  vectors (rows of  $\mathbf{A}_{cn}$ ) can be efficiently computed using the Colleau algorithm (Colleau, 2002), which can be done in parallel for many vectors at a time. The  $a_{ii}$  elements ( $\text{diag}(\mathbf{A}_{nn})$ ) are easy to compute applying the fast and efficient algorithms available for computing inbreeding coefficients (Tier, 1990; Meuwissen and Luo, 1992; Sargolzaei and Iwaisaki, 2005; Sargolzaei et al., 2005). However, computing  $\mathbf{A}_{22}^{-1}$  via the APY algorithm is a problem in a loop, which means to obtain the inverse of a block of  $\mathbf{A}$  (i.e.,  $\mathbf{A}_{22}^{-1}$ ), the inverse of its sub-block ( $\mathbf{A}_{cc}^{-1}$ ) is required. There are two other well established methods for the calculation of  $\mathbf{A}_{22}^{-1}$  (Colleau, 2002; Faux and Gengler, 2013).

Contrarily, one may apply the APY algorithm for inverting  $\mathbf{A}^{-1}$  to  $\mathbf{A}$ . Though calculating  $\mathbf{A}$  is computationally expensive, calculation of  $\mathbf{A}^{-1}$  is computationally fast and efficient (Henderson, 1975),

102 even for large populations. The computational cost of inverting  $\mathbf{A}^{-1}$  to  $\mathbf{A}$  can be reduced by obtaining  
 103 an APY inversion of  $\mathbf{A}^{-1}$ :

$$\mathbf{A}_{\text{APY}} = \begin{bmatrix} (\mathbf{A}^{cc})^{-1} & \mathbf{0} \\ \mathbf{0} & \mathbf{0} \end{bmatrix} + \begin{bmatrix} -(\mathbf{A}^{cc})^{-1}\mathbf{A}^{cn} \\ \mathbf{I} \end{bmatrix} (\mathbf{M}^{nn})^{-1} \begin{bmatrix} -(\mathbf{A}^{cc})^{-1}\mathbf{A}^{cn} \\ \mathbf{I} \end{bmatrix}', \quad (13)$$

104 where  $\mathbf{M}^{nn}$  is a diagonal matrix with diagonal elements  $m^{ii} = a^{ii} - \mathbf{a}^{ic}(\mathbf{A}^{cc})^{-1}\mathbf{a}^{ic}$ . Matrix  $\mathbf{A}^{nn}$  is  
 105 sparse. Thus, compared to  $\mathbf{G}^{nn}$ , there are considerably fewer non-zero off-diagonal elements set to 0.  
 106 On the other hand, the choices of core size and core composition are likely to be more important. In  
 107 the APY algorithm, relationships among non-core individuals are conditioned on the information from  
 108 core individuals. In  $\mathbf{A}$ , the number of relatives that can explain the relationships between a non-core  
 109 individual with other non-core individuals is limited. Thus, the choice of core individuals becomes more  
 110 difficult. Contrarily, in  $\mathbf{G}$  all individuals share information via many markers, regardless of whether they  
 111 are relatives.

112 If rather than  $\mathbf{A}$ , a diagonal block of it ( $\mathbf{A}_{cc}$ ) is needed, some of the calculations in Eq. 13 become  
 113 redundant, and  $\mathbf{A}_{cc}$  can be calculated as:

$$\begin{aligned} (\mathbf{A}_{cc})_{\text{APY}} &= (\mathbf{A}^{cc})^{-1} + (\mathbf{A}^{cc})^{-1}\mathbf{A}^{cn}(\mathbf{M}^{nn})^{-1}\mathbf{A}^{nc}(\mathbf{A}^{cc})^{-1} \\ &= (\mathbf{A}^{cc})^{-1}(\mathbf{A}^{cc} + \mathbf{A}^{cn}(\mathbf{M}^{nn})^{-1}\mathbf{A}^{nc})(\mathbf{A}^{cc})^{-1}. \end{aligned} \quad (14)$$

114 Calculating  $(\mathbf{A}_{cc})_{\text{APY}}$ , there is no choice of the core size and composition, as the choice of individuals  
 115 for which the relationship coefficients to be approximated is already made. The APY approximation  
 116 of  $\mathbf{A}_{cc}$  might be influenced by  $\mathbf{A}^{nn}$  changed to the diagonal  $(\mathbf{M}^{nn})^{-1}$ . Should APY approximations  
 117 need improvement, the researcher might consider adding a chosen group of non-core individuals to the  
 118 core subset. An application for  $\mathbf{A}_{cc}$  is to calculate  $\mathbf{A}_{22}$  for blending with  $\mathbf{G}$  to improve the numerical  
 119 condition of  $\mathbf{G}$ , and to introduce residual polygenic variance not captured by the markers.

120 The APY algorithm helped overcome the limitations of inverting  $\mathbf{G}$ . On the contrary, this constraint  
 121 does not exist for marker effect models (*i.e.*, SNP-BLUP and ss-SNP-BLUP) because a marker  $\times$  marker  
 122 matrix is used instead of  $\mathbf{G}^{-1}$ , which does not need to be inverted. This advantage comes at the price  
 123 of dense matrix multiplications, and convergence complexities (Vandenplas et al., 2018; Bermann et al.,  
 124 2022). Unlike  $\mathbf{G}$ , the size of that matrix remains constant over time unless the genotyping platform  
 125 changes, and the old genotypes are imputed to a genotyping platform with a higher marker density.  
 126 In fact, GBLUP and SNP-BLUP are equivalent models (Bermann et al., 2022). Conversion formulas  
 127 between these two models are presented in the Appendix.

128 The mixed model equations (MME) of the marker effect models do not require direct matrix inversion  
 129 (Fernando et al., 2014). Indirect inversion of  $\mathbf{A}$  is needed, which is easy to obtain. However, due to con-  
 130 vergence difficulties, a specialised preconditioned conjugate gradient (PCG) solver with a block-diagonal  
 131 Jacobi preconditioner matrix is applied, which is extended from single-trait to multi-trait analyses (Har-  
 132 ris et al., 2022). As such, a marker  $\times$  marker diagonal block of the MME (here called  $\mathbf{Q}$ ) is inverted,  
 133 which is expanded by the number of traits in the model. The APY algorithm is a good candidate for  
 134 this scenario, where the markers are divided into core and non-core. Only the block corresponding to  
 135 core markers ( $\mathbf{Q}_{cc}$ ) is inverted. Similar rules applied to  $\mathbf{G}_{\text{APY}}^{-1}$  are applied to this scenario, with the  
 136 difference that the role of markers and genotyped individuals are switched. Due to collinearity in the  
 137 marker  $\times$  individual genotype matrix, this matrix is not of full rank. The main source of collinearity  
 138 is the markers with low minor allele frequency. Also, it would probably not take all the genotyped  
 139 individuals to explain marker effects. Therefore,  $\mathbf{Q}$  has a limited dimensionality, and the off-diagonal  
 140 elements of  $\mathbf{Q}_{nn}$  (in the preconditioner matrix, not in the MME) are conditioned on  $\mathbf{Q}_{cc}$  and  $\mathbf{Q}_{cn}$ . The  
 141  $\mathbf{Q}_{\text{APY}}^{-1}$  is a preconditioner matrix with the preconditioning properties similar to those of  $\mathbf{Q}^{-1}$ . Though  
 142 the number of PCG iterations might differ, the cost of storing  $\mathbf{Q}_{\text{APY}}^{-1}$  in the memory is cheaper, and each  
 143 PCG iteration is expected to be faster.

144 The core size and composition define the APY accuracy. Core size, which its optimum is a function  
 145 of the effective population size (Pocrnic et al., 2016), is the most important. As long as there is room to  
 146 increase the core size to span over 98% of the eigenvalue spectra of  $\mathbf{G}$ , a random set of core individuals  
 147 is shown to perform well because it gives good coverage over generations and breeds in the population  
 148 (Nilforooshan and Lee, 2019). The problem of nonidentical results for random cores and the same data  
 149 can be addressed by saving the identification of the core individuals. There is ongoing research on finding  
 150 the optimal core subset, and it is an important topic for admix populations and when the core size is  
 151 constrained. When the core size is limited, an optimum core composition can harvest a larger variation

152 of  $\mathbf{G}$ . Though with a sufficiently large core size, the gain from an optimal core subset would be marginal  
153 (Nilforooshan and Lee, 2019), if screening for the optimal core subset is computationally affordable, it  
154 would be proffered over a random core subset.

155 The APY accuracy is usually measured by the correlation between genomic breeding values obtained  
156 via  $\mathbf{G}^{-1}$  and  $\mathbf{G}_{\text{APY}}^{-1}$ . However, it might be okay to have a correlation coefficient slightly less than 1. A  
157 small variation of  $\mathbf{G}$  might be due to collinearity and noise-related and good to get discharged. The  
158 APY algorithm may help reduce the collinearity and noise in  $\mathbf{G}$ . Nilforooshan and Lee (2019) showed  
159 that APY reduced the very large  $\max(\text{diag}(\mathbf{G}^{-1}))$ , which is a sign of reduced collinearity and improved  
160 condition of  $\mathbf{G}$ . Validation of genomic breeding values is a good complementary.

161 It is unknown what proportion of random markers would cover over 98% of the eigenvalue spectra of  
162  $\mathbf{Q}$ . Similar to the concept of effective population size defining the optimum number of core individuals  
163 for  $\mathbf{G}_{\text{APY}}^{-1}$  might be the concept of effective marker size defining the optimum number of core markers  
164 for  $\mathbf{Q}_{\text{APY}}^{-1}$ . Such markers are likely segregating in the coding regions, with effects as independent and  
165 orthogonal as possible to other markers; a concept similar to independent chromosome segments equal  
166 to  $2N_eL/\log(4N_eL)$  (Goddard, 2009), where  $N_e$  is the effective population size, and  $L$  is the length  
167 of chromosome in Morgans. Therefore,  $\mathbf{G}$  and  $\mathbf{Q}$  might have similar dimensionality, and the required  
168 core size might be the same for both. Possibly, choosing markers corresponding to the highest diagonal  
169 elements of  $\mathbf{Q}$  is better than a random set of core markers. This is because those markers cover a larger  
170 variation in  $\mathbf{Q}$  (*i.e.*,  $\text{trace}(\mathbf{Q}) = \sum \text{eigenvalue}(\mathbf{Q})$ ). This would favour choosing markers with lower  
171 minor allele frequency. An optimised core subset may reduce the need for a larger core size (*i.e.*, the  
172 same variation in  $\mathbf{Q}$  captured by a smaller set of markers). Future research is needed on this topic.

## 173 Conclusions

174 This study aimed to open new insights and understanding about the APY algorithm and to introduce  
175 new possible applications to this algorithm. Starting from the  $\mathbf{H}$  matrix formula, it was shown that  
176 every covariance or inverse covariance matrix could be shown as a combination of its two diagonal blocks  
177 (diagonal blocks for genotyped and non-genotyped individuals in  $\mathbf{H}$ ). The projection matrix makes the  
178 combination (information flow) between the two diagonal blocks. Furthermore, it was shown that any  
179 covariance or inverse covariance matrix has APY and APY inverse expressions equal to the matrix  
180 itself and its inverse, respectively. The difference arises when a diagonal block of the APY inverse  
181 (corresponding to non-core individuals) changes to a specific diagonal matrix. That change is projected  
182 to the rest of the inverse matrix via the projection matrix. That diagonal matrix sets non-core individuals  
183 independent from each other conditional to the coefficients provided by the core individuals. The APY  
184 algorithm can also be understood as an (approximate) absorption of the off-diagonal elements of a  
185 diagonal block into the rest of the matrix.

186 The APY algorithm is based on the concept of the limited dimensionality. A genomic relationship  
187 matrix has a limited dimensionality equivalent to the number of independent chromosome segments,  
188 which allows a reduction in the dimensionality of  $\mathbf{G}$ . Therefore, it would take the inverse of a diagonal  
189 block of  $\mathbf{G}$  to invert  $\mathbf{G}$ . An APY inverse of  $\mathbf{G}$  with a sufficient core size and proper core composition  
190 produces genomic breeding values analogous to those using the exact  $\mathbf{G}^{-1}$ . Possible new applications for  
191 APY are: computing  $\mathbf{A}$ , a diagonal block of  $\mathbf{A}$ , and the block of the block-diagonal preconditioner matrix  
192 corresponding to marker effects for iterative solving of marker effect model equations. The application of  
193 APY is not limited to obtaining the best sparse approximates of  $\mathbf{G}^{-1}$ , and new applications may emerge  
194 in the future.

## 195 References

- 196 Aguilar, I., Misztal, I., Johnson, D. L., Legarra, A., Tsuruta, S., and Lawlor, T. J. (2010). Hot topic: A  
197 unified approach to utilize phenotypic, full pedigree, and genomic information for genetic evaluation  
198 of Holstein final score. *J. Dairy Sci.*, 93(2):743–752. <https://doi.org/10.3168/jds.2009-2730>.
- 199 Bermann, M., Lourenco, D., Forneris, N. S., Legarra, A., and Misztal, I. (2022). On the equivalence  
200 between marker effect models and breeding value models and direct genomic values with the Algorithm  
201 for Proven and Young. *Genet. Sel. Evol.*, 54(1):52. <https://doi.org/10.1186/s12711-022-00741-7>.
- 202 Christensen, O. F. and Lund, M. S. (2010). Genomic prediction when some animals are not genotyped.  
203 *Genet. Sel. Evol.*, 42(1):2. <https://doi.org/10.1186/1297-9686-42-2>.

- 204 Colleau, J. J. (2002). An indirect approach to the extensive calculation of relationship coefficients. *Genet.*  
205 *Sel. Evol.*, 34:409. <https://doi.org/10.1186/1297-9686-34-4-409>.
- 206 Faux, P. and Gengler, N. (2013). Inversion of a part of the numerator relationship matrix using pedigree  
207 information. *Genet. Sel. Evol.*, 45(1):45. <https://doi.org/10.1186/1297-9686-45-45>.
- 208 Fernando, R. L., Cheng, H., and Garrick, D. J. (2016). An efficient exact method to obtain GBLUP  
209 and single-step GBLUP when the genomic relationship matrix is singular. *Genet. Sel. Evol.*, 48(1):80.  
210 <https://doi.org/10.1186/s12711-016-0260-7>.
- 211 Fernando, R. L., Dekkers, J. C. M., and Garrick, D. J. (2014). A class of Bayesian methods to combine  
212 large numbers of genotyped and non-genotyped animals for whole-genome analyses. *Genet. Sel. Evol.*,  
213 46(1):50. <https://doi.org/10.1186/1297-9686-46-50>.
- 214 Fragomeni, B. O., Lourenco, D. A. L., Tsuruta, S., Masuda, Y., Aguilar, I., Legarra, A., Lawlor, T. J.,  
215 and Misztal, I. (2015). Hot topic: Use of genomic recursions in single-step genomic best linear unbiased  
216 predictor (BLUP) with a large number of genotypes. *J. Dairy Sci.*, 98(6):4090–4094. <https://doi.org/10.3168/jds.2014-9125>.
- 218 Goddard, M. (2009). Genomic selection: prediction of accuracy and maximisation of long term response.  
219 *Genetica*, 136(2):245–257. <https://doi.org/10.1007/s10709-008-9308-0>.
- 220 Harris, B. L., Sherlock, R. G., and Nilforooshan, M. A. (2022). Large-scale multiple-trait single-step  
221 marker model implementation. In *Proceedings of the 12th World Congress on Genetics Applied to*  
222 *Livestock Production: 3-8 July 2022; Rotterdam*.
- 223 Henderson, C. R. (1975). Rapid method for computing the inverse of a relationship matrix. *J. Dairy*  
224 *Sci.*, 58(11):1727–1730. [https://doi.org/10.3168/jds.S0022-0302\(75\)84776-X](https://doi.org/10.3168/jds.S0022-0302(75)84776-X).
- 225 Koivula, M., Strandén, I., Su, G., and Mäntysaari, E. A. (2012). Different methods to calculate genomic  
226 predictions—Comparisons of BLUP at the single nucleotide polymorphism level (SNP-BLUP), BLUP  
227 at the individual level (G-BLUP), and the one-step approach (H-BLUP). *J. Dairy Sci.*, 95(7):4065–  
228 4073. <https://doi.org/10.3168/jds.2011-4874>.
- 229 Legarra, A., Aguilar, I., and Misztal, I. (2009). A relationship matrix including full pedigree and genomic  
230 information. *J. Dairy Sci.*, 92(9):4656–4663. <https://doi.org/10.3168/jds.2009-2061>.
- 231 Mäntysaari, E. A., Evans, R. D., and Strandén, I. (2017). Efficient single-step genomic evaluation for a  
232 multibreed beef cattle population having many genotyped animals. *J. Anim. Sci.*, 95(11):4728–4737.  
233 <https://doi.org/10.2527/jas2017.1912>.
- 234 Meuwissen, T. H. E. and Luo, Z. (1992). Computing inbreeding coefficients in large populations. *Genet.*  
235 *Sel. Evol.*, 24:305–313. <https://doi.org/10.1186/1297-9686-24-4-305>.
- 236 Misztal, I. (2016). Inexpensive computation of the inverse of the genomic relationship matrix in popu-  
237 lations with small effective population size. *Genetics*, 202(2):401–409. <https://doi.org/10.1534/genetics.115.182089>.
- 239 Misztal, I., Legarra, A., and Aguilar, I. (2014). Using recursion to compute the inverse of the genomic  
240 relationship matrix. *J. Dairy Sci.*, 97(6):3943–3952. <https://doi.org/10.3168/jds.2013-7752>.
- 241 Nilforooshan, M. A. and Lee, M. (2019). The quality of the algorithm for proven and young with various  
242 sets of core animals in a multi-breed sheep population. *J. Anim. Sci.*, 97(3):1090–1110. <https://doi.org/10.1093/jas/skz010>.
- 244 Pocrnic, I., Lourenco, D. A. L., Masuda, Y., Legarra, A., and Misztal, I. (2016). The dimensionality of  
245 genomic information and its effect on genomic prediction. *Genetics*, 203(1):573–581. <https://doi.org/10.1534/genetics.116.187013>.
- 247 Sargolzaei, M. and Iwaisaki, H. (2005). Comparison of four direct algorithms for computing inbreeding  
248 coefficients. *Anim. Sci. J.*, 76:401–406. <https://doi.org/10.1111/j.1740-0929.2005.00282.x>.
- 249 Sargolzaei, M., Iwaisaki, H., and Colleau, J. J. (2005). A fast algorithm for computing inbreeding  
250 coefficients in large populations. *J. Anim. Breed. Genet.*, 122:325–331. <https://doi.org/10.1111/j.1439-0388.2005.00538.x>.
- 251

- 252 Snelson, E. and Ghahramani, Z. (2007). Local and global sparse gaussian process approximations. In  
 253 *Proceedings of the Eleventh International Conference on Artificial Intelligence and Statistics*, volume 2  
 254 of *Proceedings of Machine Learning Research*, pages 524–531, San Juan, Puerto Rico. PMLR. [https://](https://proceedings.mlr.press/v2/snelson07a.html)  
 255 [proceedings.mlr.press/v2/snelson07a.html](https://proceedings.mlr.press/v2/snelson07a.html) (accessed on 24 November 2022).
- 256 Strandén, I., Matilainen, K., Aamand, G. P., and Mäntysaari, E. A. (2017). Solving efficiently large  
 257 single-step genomic best linear unbiased prediction models. *J. Anim. Breed. Genet.*, 134(3):264–274.  
 258 <https://doi.org/https://doi.org/10.1111/jbg.12257>.
- 259 Tier, B. (1990). Computing inbreeding coefficients quickly. *Genet. Sel. Evol.*, 22:419–430. [https://](https://doi.org/10.1186/1297-9686-22-4-419)  
 260 [doi.org/10.1186/1297-9686-22-4-419](https://doi.org/10.1186/1297-9686-22-4-419).
- 261 Vandenplas, J., Eding, H., Calus, M. P. L., and Vuik, C. (2018). Deflated preconditioned conjugate  
 262 gradient method for solving single-step blup models efficiently. *Genet. Sel. Evol.*, 50(1):51. [https://](https://doi.org/10.1186/s12711-018-0429-3)  
 263 [doi.org/10.1186/s12711-018-0429-3](https://doi.org/10.1186/s12711-018-0429-3).
- 264 VanRaden, P. M. (2008). Efficient methods to compute genomic predictions. *J. Dairy Sci.*, 91(11):4414–  
 265 4423. <https://doi.org/10.3168/jds.2007-0980>.

## 266 Appendix

267 Considering the MME for GBLUP:

$$\begin{bmatrix} \mathbf{X}'\mathbf{X} & \mathbf{X}'\mathbf{Z} \\ \mathbf{Z}'\mathbf{X} & \mathbf{Z}'\mathbf{Z} + \mathbf{G}^{-1}\alpha \end{bmatrix} \begin{bmatrix} \hat{\mathbf{b}} \\ \hat{\mathbf{u}} \end{bmatrix} = \begin{bmatrix} \mathbf{X}'\mathbf{y} \\ \mathbf{Z}'\mathbf{y} \end{bmatrix},$$

268 and  $\mathbf{G} = \mathbf{W}\mathbf{W}'$ , conversion of GBLUP to SNP-BLUP MME follows:

$$\begin{aligned} & \begin{bmatrix} \mathbf{I} & \mathbf{0} \\ \mathbf{0} & \mathbf{W} \end{bmatrix}' \begin{bmatrix} \mathbf{X}'\mathbf{X} & \mathbf{X}'\mathbf{Z} \\ \mathbf{Z}'\mathbf{X} & \mathbf{Z}'\mathbf{Z} + \mathbf{G}^{-1}\alpha \end{bmatrix} \begin{bmatrix} \mathbf{I} & \mathbf{0} \\ \mathbf{0} & \mathbf{W} \end{bmatrix} \begin{bmatrix} \hat{\mathbf{b}} \\ \hat{\mathbf{a}} \end{bmatrix} = \begin{bmatrix} \mathbf{I} & \mathbf{0} \\ \mathbf{0} & \mathbf{W} \end{bmatrix}' \begin{bmatrix} \mathbf{X}'\mathbf{y} \\ \mathbf{Z}'\mathbf{y} \end{bmatrix} \\ \Rightarrow & \begin{bmatrix} \mathbf{X}'\mathbf{X} & \mathbf{X}'\mathbf{Z}\mathbf{W} \\ \mathbf{W}'\mathbf{Z}'\mathbf{X} & \mathbf{W}'\mathbf{Z}'\mathbf{Z}\mathbf{W} + \mathbf{W}'\mathbf{G}^{-1}\mathbf{W}\alpha \end{bmatrix} \begin{bmatrix} \hat{\mathbf{b}} \\ \hat{\mathbf{a}} \end{bmatrix} = \begin{bmatrix} \mathbf{X}'\mathbf{y} \\ \mathbf{W}'\mathbf{Z}'\mathbf{y} \end{bmatrix} \\ \Rightarrow & \begin{bmatrix} \mathbf{X}'\mathbf{X} & \mathbf{X}'\mathbf{V} \\ \mathbf{V}'\mathbf{X} & \mathbf{V}'\mathbf{V} + \mathbf{I}\alpha \end{bmatrix} \begin{bmatrix} \hat{\mathbf{b}} \\ \hat{\mathbf{a}} \end{bmatrix} = \begin{bmatrix} \mathbf{X}'\mathbf{y} \\ \mathbf{V}'\mathbf{y} \end{bmatrix}. \end{aligned}$$

269 On the other hand, the conversion of SNP-BLUP to GBLUP is as follows:

$$\begin{bmatrix} \mathbf{I} & \mathbf{0} \\ \mathbf{0} & \mathbf{W}^{-1} \end{bmatrix} \begin{bmatrix} \mathbf{X}'\mathbf{X} & \mathbf{X}'\mathbf{V} \\ \mathbf{V}'\mathbf{X} & \mathbf{V}'\mathbf{V} + \mathbf{I}\alpha \end{bmatrix} \begin{bmatrix} \mathbf{I} & \mathbf{0} \\ \mathbf{0} & \mathbf{W}^{-1} \end{bmatrix}' \begin{bmatrix} \hat{\mathbf{b}} \\ \hat{\mathbf{u}} \end{bmatrix} = \begin{bmatrix} \mathbf{I} & \mathbf{0} \\ \mathbf{0} & \mathbf{W}^{-1} \end{bmatrix} \begin{bmatrix} \mathbf{X}'\mathbf{y} \\ \mathbf{V}'\mathbf{y} \end{bmatrix},$$

270 where  $\hat{\mathbf{b}}$ ,  $\hat{\mathbf{u}}$  and  $\hat{\mathbf{a}}$  are the vectors of solutions for fixed effects, individuals' additive genetic merit and  
 271 marker effects,  $\alpha = \sigma_e^2/\sigma_m^2$ ,  $\sigma_e^2$  is the residual variance, and  $\sigma_m^2$  is the additive genetic variance captured  
 272 by markers.
